# Supplementary material
Source: PubMed Central journal article supplement (PMC7577169)
Supplement: AAC.01381-20-s0001.pdf [file AAC.01381-20-s0001.pdf]

## Supplementary figure

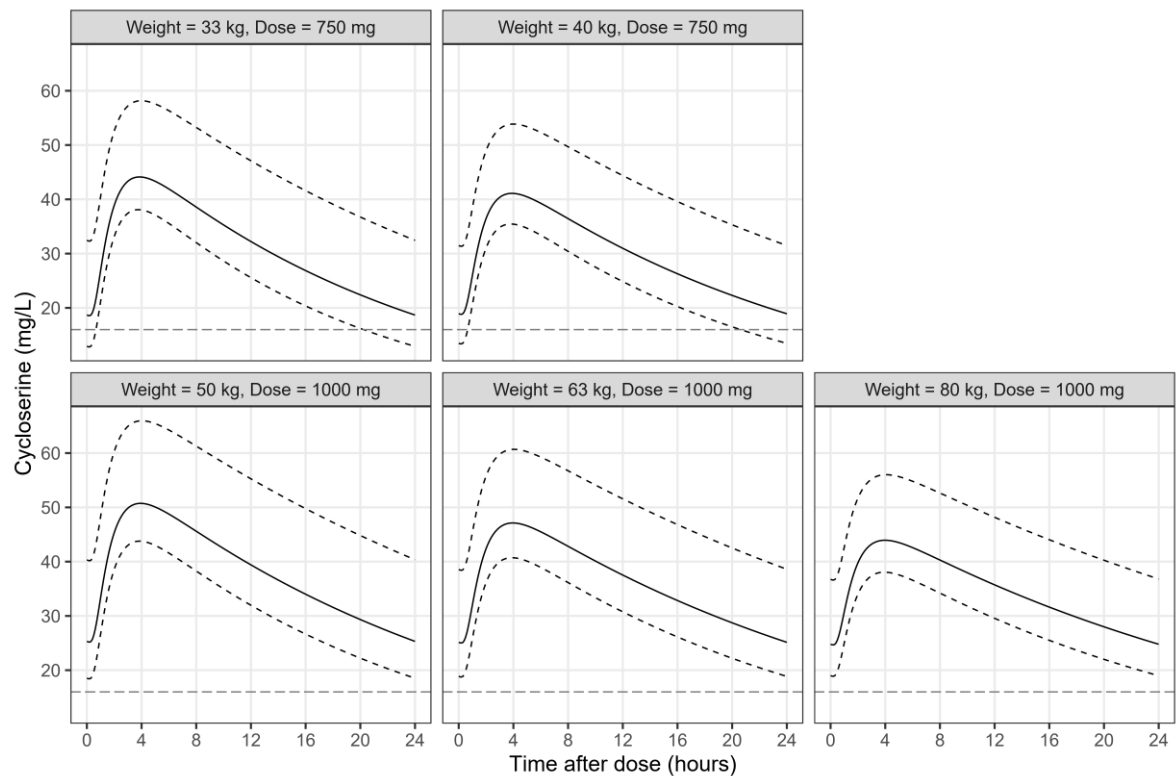

**Figure S1.** Simulated steady-state concentration-time profiles for a typical individual in each weight band whose weight is close to the center of the weight band and given a dose of terizidone. The solid line represents the predicted concentration if the creatinine clearance is 100 ml/min. The upper and lower dashed lines correspond to a creatinine clearance of 50 ml/min and 140 ml/min, respectively. The extreme values of creatinine clearance represent the 5<sup>th</sup> and 95<sup>th</sup> percentiles of creatinine clearance for our cohort. The horizontal long dashed line represents an MIC of 16 mg/L.
